# Supplementary material for: Intraoperative Hyperglycemia May Be Associated with an Increased Risk of Myocardial Injury after Non-Cardiac Surgery in Diabetic Patients
Source: MDPI journal article supplement (doi:10.3390/jcm10225219), 2021-11-09
Supplement: s1 [file s1]

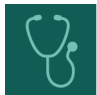

# Intraoperative Hyperglycemia May Be Associated with an Increased Risk of Myocardial Injury after Non-Cardiac Surgery in Diabetic Patients

Sojin Kim <sup>1,†</sup>, Jungchan Park <sup>1,2,†</sup>, Hara Kim <sup>1</sup>, Kwangmo Yang <sup>3</sup>, Jin-ho Choi <sup>4</sup>, Kyunga Kim <sup>5,6</sup>, Jidong Sung <sup>7</sup>, Joonghyun Ahn <sup>5</sup> and Seung-Hwa Lee <sup>7,8,\*</sup>

<sup>1</sup> Department of Anesthesiology and Pain Medicine, Samsung Medical Center, Sungkyunkwan University School of Medicine, Seoul 06351, Korea; sojin.kim@samsung.com (S.K.); jc83.park@samsung.com (J.P.); hara.kim@samsung.com (H.K.)

<sup>2</sup> Department of Biomedical Sciences, Ajou University Graduate School of Medicine, Suwon 16499, Korea

<sup>3</sup> Center for Health Promotion, Samsung Medical Center, Sungkyunkwan University School of Medicine, Seoul 06351, Korea; kmhi.yang@samsung.com (K.Y.)

<sup>4</sup> Department of Emergency Medicine, Samsung Medical Center, Sungkyunkwan University School of Medicine, Seoul 06351, Korea; jin-ho.choi@samsung.com (J.-h.C.)

<sup>5</sup> Statistics and Data Center, Research Institute for Future Medicine, Samsung Medical Center, Seoul 06351, Korea; kyunga.j.kim@samsung.com (K.K.); jhguy.ahn@samsung.com (J.A.)

<sup>6</sup> Department of Digital Health, SAIHST, Sungkyunkwan University, Seoul 06351, Korea

<sup>7</sup> Department of Cardiology, Rehabilitation & Prevention Center, Heart Vascular Stroke Institute, Samsung Medical Center, Sungkyunkwan University School of Medicine, Seoul 06351, Korea; jidong\_sung@samsung.com (J.D.S.)

<sup>8</sup> Department of Biomedical Engineering, Seoul National University College of Medicine, Seoul 03080, Korea

\* Correspondence: shuaaa.lee@samsung.com; Tel: +82-2-3410-3214; Fax: +82-2-3410-3849

† The first two authors contributed equally to this work (S.K., J.P.).

Supplemental Table S1. Types of surgery.

|                                | <b>BST &lt; 180<br/>(n=8337)</b> | <b>BST ≥ 180<br/>(n=2965)</b> |
|--------------------------------|----------------------------------|-------------------------------|
| Vascular                       | 490 (5.9)                        | 166 (5.6)                     |
| Orthopediatric                 | 299 (3.6)                        | 88 (3.0)                      |
| Neuro                          | 2335 (28.0)                      | 357 (12.0)                    |
| Breast or Endo                 | 96 (1.2)                         | 28 (0.9)                      |
| Plastic or Otolaryngeal or Eye | 108 (1.3)                        | 44 (1.5)                      |
| Transplantation                | 607 (7.3)                        | 332 (11.2)                    |
| Gynecology or Urology          | 265 (3.2)                        | 134 (4.5)                     |
| Gastrointestinal               | 3346 (40.1)                      | 1575 (53.1)                   |
| Noncardiac thoracic            | 781 (9.4)                        | 236 (8.0)                     |
| Others                         | 10 (0.1)                         | 5 (0.2)                       |

Supplemental Table S2. Sensitivity analysis of the effect of an unmeasured confounder on odd ratio for incidence of myocardial injury after non-cardiac surgery due to intraoperative hyperglycemia.

|                  | <b>OR<sub>ZY X</sub></b> |                    |                    |                    |                    |                    |
|------------------|--------------------------|--------------------|--------------------|--------------------|--------------------|--------------------|
|                  | <b>1.5</b>               | <b>2</b>           | <b>2.5</b>         | <b>3</b>           | <b>3.5</b>         | <b>4</b>           |
|                  | 0.31.77 (1.59 - 1.97)    | 1.96 (1.76 - 2.19) | 2.14 (1.92 - 2.39) | 2.31 (2.06 - 2.58) | 2.48 (2.21 - 2.78) | 2.64 (2.35 - 2.96) |
|                  | 0.41.70 (1.53 - 1.89)    | 1.84 (1.65 - 2.05) | 1.96 (1.76 - 2.19) | 2.08 (1.87 - 2.32) | 2.19 (1.96 - 2.45) | 2.30 (2.05 - 2.57) |
| OR <sub>ZX</sub> | 0.51.65 (1.49 - 1.84)    | 1.75 (1.58 - 1.95) | 1.84 (1.66 - 2.05) | 1.93 (1.73 - 2.15) | 2.01 (1.80 - 2.24) | 2.08 (1.86 - 2.32) |
|                  | 0.61.62 (1.46 - 1.79)    | 1.69 (1.52 - 1.88) | 1.76 (1.58 - 1.95) | 1.82 (1.63 - 2.02) | 1.87 (1.68 - 2.09) | 1.93 (1.73 - 2.15) |
|                  | 0.71.59 (1.43 - 1.76)    | 1.64 (1.48 - 1.82) | 1.69 (1.52 - 1.87) | 1.73 (1.56 - 1.92) | 1.77 (1.59 - 1.97) | 1.81 (1.62 - 2.01) |

Prevalence of unmeasured confounder = 40%; Numbers represent ORs. (including 95% CIs); OR, odds ratio; HR, hazard ratio; X: dichotomous exposure measure, y dichotomous outcome measure, z: potential dichotomous confounder; ORZX indicates the association (OR) between the unmeasured confounder and intraoperative hyperglycemia; ORZY|X indicates the association (OR) between the unmeasured confounder and incidence of MINS conditional on exposure status.
